# Supplementary material for: Diagnostic performance of a single and duplicate Kato-Katz, Mini-FLOTAC, FECPAKG2 and qPCR for the detection and quantification of soil-transmitted helminths in three endemic countries
Source: PLOS journal article supplement (doi:10.1371/journal.pntd.0007446), 2019-08-01
Supplement: S6 (10.1371/journal.pntd.0007446.s006) [file journal.pntd.0007446.s006]

**S6 Info. Prevalence of helminths (other than *Ascaris*, *Trichuris* and hookworm) as determined by qPCR in the three study sites.** For each parasite and study site, the number of cases on the number of samples analysed is shown, with the percentage in between brackets.

|                                  | <b>Ethiopia</b> | <b>Laos</b>   | <b>Tanzania</b> |
|----------------------------------|-----------------|---------------|-----------------|
| <i>Schistosoma</i> sp.           | 32/332 (9.6%)   | 2/478 (0.4%)  | 12/490 (2.5%)   |
| <i>Strongyloides stercoralis</i> | 10/332 (3.1%)   | 13/478 (2.8%) | 23/490 (4.7%)   |
| <i>Taenia</i> sp.                | 17/332 (5.0%)   | 14/478 (3.0%) | 4/490 (0.8%)    |
| <i>Hymenolepis nana</i>          | 14/100 (14.0%)  | 0/100 (0%)    | 0/130 (0%)      |
| <i>Enterobius vermicularis</i>   | 10/100 (10.0%)  | 0/100 (0%)    | 0/130 (0%)      |
